# Supplementary material for: Electrospun silica/nafion hybrid products: mechanical property improvement, wettability tuning and periodic structure adjustment
Source: Royal Society of Chemistry journal article supplement (doi:10.1039/c4ta03183k), 2014-08-12
Supplement: c4ta03183k1.pdf [file c4ta03183k1.pdf]

## **Electrospun Silica/Nafion Hybrid Products: Mechanic Improving, Wettability Tuning and Periodic Structure Adjusting**

Jianjun Li,<sup>a</sup> Jungang Cao,<sup>b</sup> Zhonglin Wei,<sup>b</sup> Min Yang,<sup>c</sup> Weilong Yin,<sup>a</sup> Kai Yui,<sup>d</sup>

Yongtao Yao,<sup>\*a</sup> Haibao Lv,<sup>\*a</sup> Xiaodong He,<sup>a</sup> Jinsong Leng,<sup>a</sup>

<sup>a</sup>National Key Laboratory of Science and Technology on Advanced Composites in  
Special Environments, Harbin Institute of Technology, Harbin, 150080, P. R. China

E-mail: yaoyt99@163.com and luhb@hit.edu.cn

<sup>b</sup>College of Chemistry, Jilin University, Changchun, 130012, P. R. China

<sup>c</sup>School of Chemical Engineering & Technology, Harbin Institute of Technology,  
Harbin, 150080, P. R. China

<sup>d</sup>The George Woodruff School of Mechanical Engineering, Georgia Institute of  
Technology, Atlanta, GA 30332, USA

Pure SiO<sub>2</sub> membrane

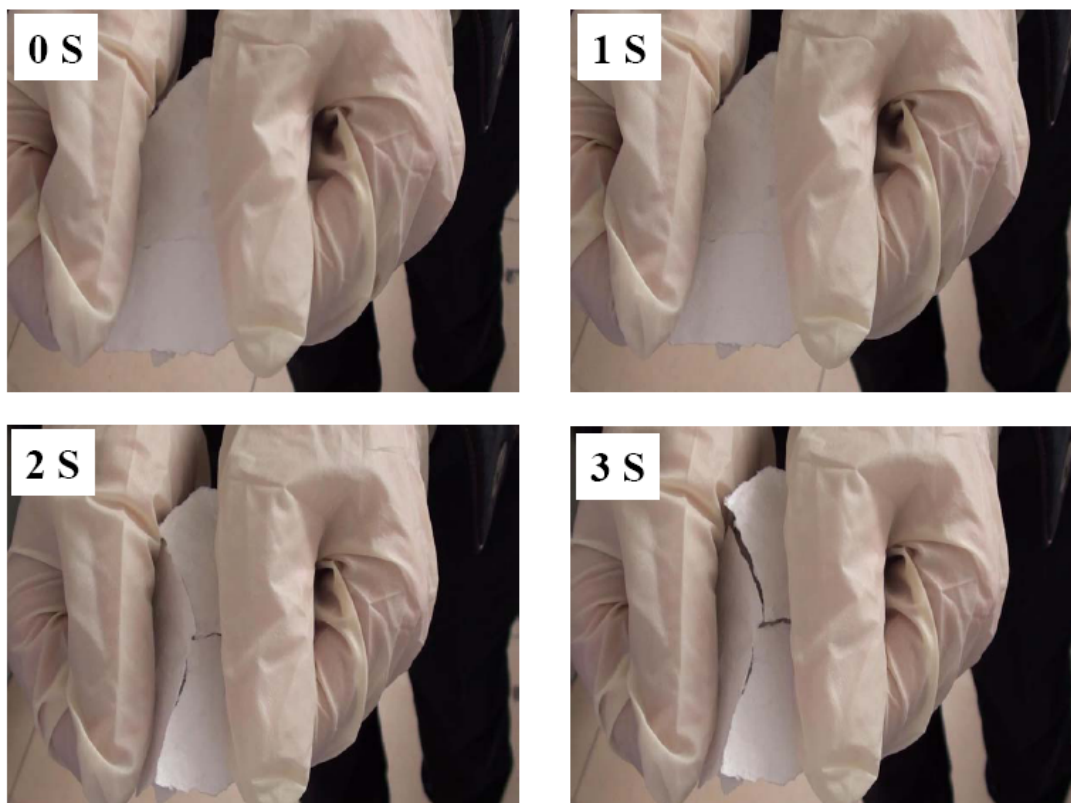

**Figure S1.** Indication of brittleness of electrospun pure silica membrane.

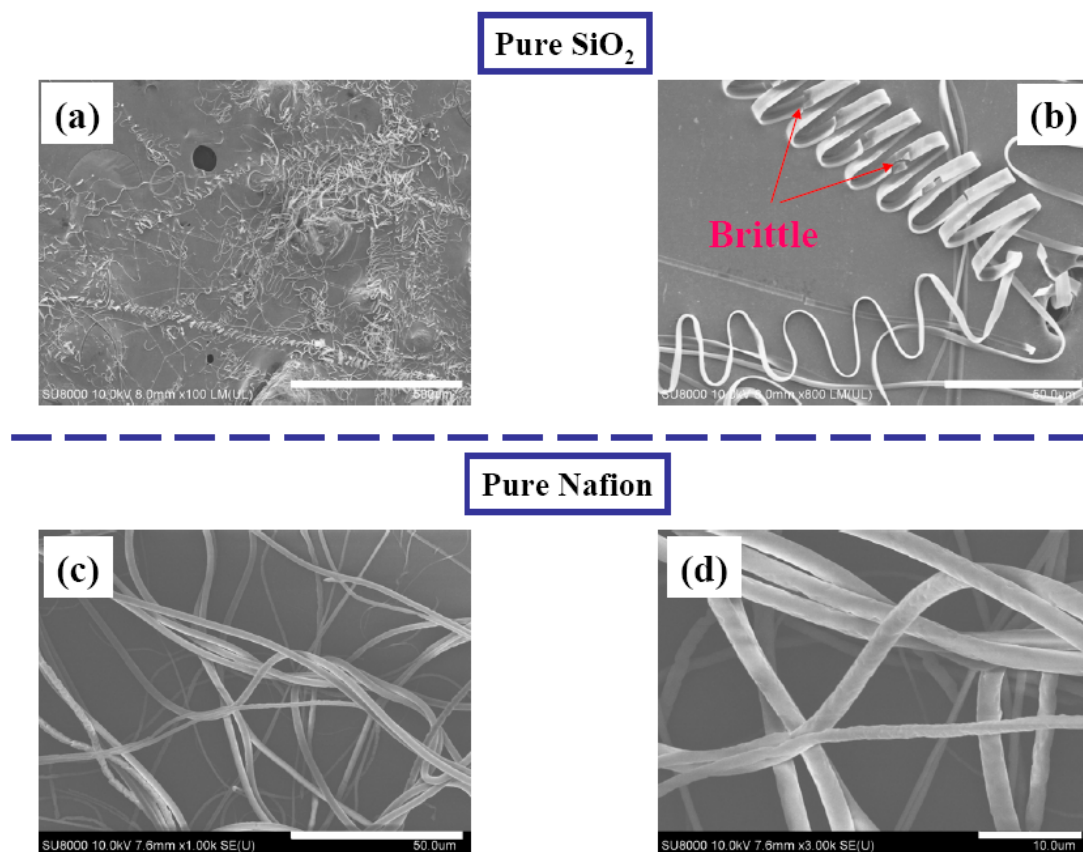

**Figure S2.** SEM images of silica ribbon with long-range periodic structure (a: scalar bar 500  $\mu\text{m}$ ) and brittleness of single electrospun silica product (b: scalar bar 60  $\mu\text{m}$ ); SEM images of Nafion with a much narrow diameter distribution (c and d: scalar bar 50 and 10  $\mu\text{m}$ ).

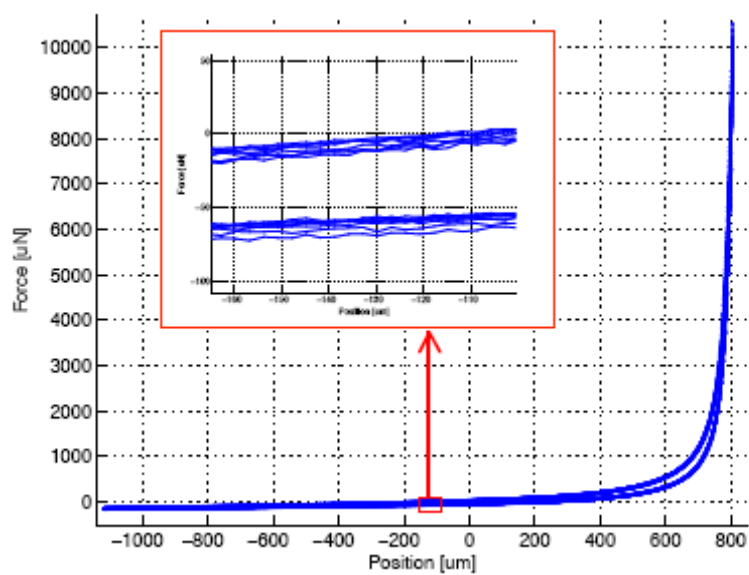

**Figure S3.** Force versus deformation curve of hybrid fiber under -150~11000  $\mu\text{N}$  and the measurement has been repeated 8 times.
